# Supplementary material for: Prediction Models for Prognosis of Cervical Cancer: Systematic Review and Critical Appraisal
Source: Front Public Health. 2021 May 7;9:654454. doi: 10.3389/fpubh.2021.654454 (PMC8137851; doi:10.3389/fpubh.2021.654454)
Supplement: Supplementary file 5 [file Data_Sheet_1.XLSX]

## Sheet: Models
Title	First Author	Year	Model stage	Country/Region	Participants	Outcome	Sample size	Number of events	Missing data handling	Discrimination	Calibration	Internal validation	External validation	Modelling method	Model presentation	Predictors included in final model
Prognostic Significance of Pretreatment Variables in Patients with Invasive Cervical Cancer	te Velde, E. R.	1987	develop	Netherlands	1-3 macro-invasive patients	recurrence	119	49	No information	/	/	Cross-validation	/	discriminant analysis	sum score	CEA, C3PA, %Bandforms, age of the patient, lymphvascular invasion, reticulocytes, number of eosinophils
A scoring system for predicting recurrence of cervical cancer	Ng, H. T.	1992	develop	Taiwan, China	1b-3a, received radical hysterectomy and pelvic lymph node dissection	recurrence	702	116	No information	/	/	/	/	Mantel-Cox test	sum score	age, FIGO, histologic type, grade, involvement of vagina, Uterine body invasion, lymph node, parametrium invasion, Margins free of cancer, vessel emboli
Preoperative Prognostic Variables and the Impact of Postoperative Adjuvant Therapy on the Outcomes of Stage IB or II Cervical Carcinoma Patients with or without Pelvic Lymph Node Metastases: An Analysis of 891 Cases	Lai, C. H.	1999	develop	Taiwan, China	IB or II	5-year OS	827	No information	Complete case analysis	/	/	/	/	Cox regression	equation	grade of differentiation, stage, tumor size, depth of stromal invasion, DNA index
An individual prediction of the future (disease-free) survival of patients with a history of early-stage cervical cancer, multistate model	Pieterse, Q. D.	2008	develop	Netherlands	I–IIA early-stage	Disease free to recurrence(5y)、Recurrence to death(100m)	615	80	No information	/	/	/	/	Cox model	equation	lymph node involvement, tumor size, depth of invasion, CLS involvement, parametrial invasion, adenosquamous carcinoma, nonradical surgical margins
Postoperative nomogram predicting risk of recurrence after radical hysterectomy for early-stage cervical cancer	Kim, M. K.	2010	develop	Korea	I–IIA early-stage	5-year DFS	275	21	No information	c-index: 0.858	Yes	Bootstrap	Yes（separate patient cohort）	Cox regression	Nomogram	FIGO stage, parametrial invasion, number of positive lymph nodes, invasion depth of cervix
			validate	Korea	I–IIA early-stage	5-year DFS	178	6	No information	c-index: 0.879	/	/	Yes（separate patient cohort）
			validate	Korea		5-year DFS	101	17	Complete case analysis	c-index: 0.587	/	/	Yes (validated by other investigators)
Prognostic nomogram for overall survival in stage IIB-IVA cervical cancer patients treated with concurrent chemoradiotherapy	Tseng, J. Y.	2010	develop	Taiwan, China	IIB-IVA	5-year OS	251	No information	No information	c-index: 0.69	Yes	Bootstrap	/	Cox regression	Nomogram	age, SCC-Ag, tumor size, parametrium invasion, hydronephrosis, bladder/rectum invasion, lymph node metastases
			validate	Spain	LACC (FIGO IB1–IVA)	5-year OS	211	75		c-index: 0.64	Yes	/	Yes (validated by other investigators)
Prognostic model for survival in patients with early stage cervical cancer	Biewenga, P.	2011	develop	Netherlands	IA2-IIA early-stage	5-year DSS	710	57	Multiple imputation	ROC curve: 0.85	Yes	Bootstrap	/	Cox regression	equation+score	Tumor size, histological type, presence of lymph node metastasis(LNM), depth of stromal invasion, lymph vascular space invasion(LVSI), parametrial extension
Nomogram prediction of overall survival after curative irradiation for uterine cervical cancer	Seo, Y.	2011	develop	Korea	II, III, or IVA	5-year OS	549	288	No information	c-index: 0.67	Yes	Bootstrap	/	cox regression	nomogram	age, hemoglobin (Hb) level before RT, FIGO stage, maximal tumor diameter, lymph node status, and RT dose at Point A.
Risk assessment tool for distant recurrence after platinum-based concurrent chemoradiation in patients with locally advanced cervical cancer: a Korean gynecologic oncology group study	Kang, S.	2012	develop	Korea	IIB to IVA or IB2 to IIA bulky; locally advanced	5-year distant recurrence	434	No information	Complete case analysis	c-index: 0.70	Yes	Bootstrap	Yes	cox regression, Competing Risk Analysis	nomogram	Pelvic node by PET; Para-aortic node by PET; Histology(a nonsquamous cell histologic subtype); SCC Ag(pretreatment serum squamous cell carcinoma antigen, ng/mL).
			validate	Korea		5-year distant recurrence	115	No information	Complete case analysis	c-index: 0.73	Yes	/	Yes (from other institutions)
			validate	Spain	LACC (FIGO IB1–IVA)	5-year distant recurrence	163	38		AUROC: 0.67	Yes		Yes (validated by other investigators)
FDG-PET-based prognostic nomograms for locally advanced cervical cancer	Kidd, E. A.	2012	develop	the United States	locally advanced,treated with definitive radiation or chemoradiation therapy, Ib1-Iva	1/3-year RFS	234	103	No information	c-index: 0.741	/	Cross-validation	/	cox regression	nomogram	highest PET lymph node level, PET tumor volume, cervix tumor SUVmax
			develop	the United States	locally advanced	1/3-year DSS	234	60	No information	c-index: 0.739	/	Cross-validation	/	cox regression	nomogram	highest PET lymph node level, PET tumor volume, cervix tumor SUVmax
			develop	the United States	locally advanced	1/3-year OS	234	74	No information	c-index: 0.658	/	Cross-validation	/	cox regression	nomogram	highest PET lymph node level, PET tumor volume, cervix tumor SUVmax
			validate	Spain	LACC (FIGO IB1–IVA)	1/3-year RFS	93/58	26/32		AUROC: 0.64/0.60	Yes		Yes (validated by other investigators)
			validate	Spain	LACC (FIGO IB1–IVA)	1/3-year DSS	92/52	9//20		AUROC: 0.60/0.58	Yes		Yes (validated by other investigators)
			validate	Spain	LACC (FIGO IB1–IVA)	1/3-year OS	92/53	9//21		AUROC: 0.67/0.69	Yes		Yes (validated by other investigators)
Nomogram prediction for overall survival of patients diagnosed with cervical cancer	Polterauer, S.	2012	develop	Austria	All consecutive patients	3/5-year DSS	528	77	Complete case analysis	c-index: 0.723	Yes	Bootstrap	/	cox regression	nomogram	FIGO stage, tumor size, age, histologic type, lymph node ratio, parametrial involvement
Risk assessment model for overall survival in patients with locally advanced cervical cancer treated with definitive concurrent chemoradiotherapy	Shim, S.	2012	develop	Korea	IB2-IVA, locally advanced, treated with definitive CCRT	3/5-year DSS	209	50	No information	c-index: 0.69	Yes	Bootstrap	/	cox regression	nomogram	histology, tumor size, paraaortic lymph node(PLAN) metastasis
			validate	Spain	LACC (FIGO IB1–IVA)	3/5-year DSS	240/213	69/76		AUROC: 0.52/0.55	Yes	/	Yes (validated by other investigators)
Prognostic model in patients with early-stage squamous cell carcinoma of the uterine cervix: a combination of invasive margin pathological characteristics and lymphovascular space invasion	Khunamornpong, S.	2013	develop	Thailand	IB1-2 to IIA	5-year DFS	190	18	No information	/	/	/	/	logistic regression	sum score	invasive pattern, LVSI, inflammatory reaction, desmoplasia(grade2-3, grade1)
Application of gene expression programming and neural networks to predict adverse events of radical hysterectomy in cervical cancer patients	Kusy, M.	2013	develop	Poland	patients treated surgically (IA2 to IIB)	adverse events of radical hysterectomy	107	47	No information	AUROC: 0.72	/	Resample	/	GEP machine learning	equation	age, BMI, FIGO stage
Individualized Prediction of Overall Survival After Postoperative Radiation Therapy in Patients With Early-Stage Cervical Cancer: A Korean Radiation Oncology Group Study	Lee, H. J.	2013	develop	Korea	IB-IIA, Early-Stage	5-year OS	1072	245	Complete case analysis	c-index: 0.691	Yes	/	/	cox regression	nomogram	age, number of positive pelvic LNs, parametrial invasion, LVI, concurrent chemotherapy
			validate	Korea		5-year OS	109	15	No information	c-index: 0.612	/	/	Yes (validated by other investigators)
A nomogram predicting the risks of distant metastasis following postoperative radiotherapy for uterine cervical carcinoma: a Korean radiation oncology group study (KROG 12-08)	Je, H. U.	2014	develop	Korea	I-IIA, early	5-year DMFS	748	100	No information	c-index: 0.71	Yes	Bootstrap	Yes	cox regression	nomogram	histologic type, depth of stromal invasion, Pelvic lymph node, Parametrial invasion
			validate	Korea		5-year DMFS	321	39	No information	c-index: 0.65	Yes	/	Yes (from other institutions)
			validate	Korea		5-year DMFS	109	14	No information	c-index: 0.597	/	/	Yes (validated by other investigators)
Prediction of local recurrence in cervical cancer by a Cox model comprised of lymph node status, lymph-vascular space invasion, and intratumoral Th17 cell-infiltration	Yu, Q.	2014	develop	China	stage II	5-year DFS	153	52	No missing data	AUC: 0.765	/	/	/	cox regression	equation	IL-17+ cells, LVSI and LNS
Chemotherapy-induced neutropenia during adjuvant treatment for cervical cancer patients: development and validation of a prediction model	Huang, K.	2015	develop	China	cervical cancer patients who underwent chemotherapy	chemotherapy-induced neutropenia	214	44	No information	ROC: 0.897	/	random split	Yes	Artificial neural network (ANN)	/	32 SNPs+clinical variables
			validate	China		chemotherapy-induced neutropenia	60	No information	No information	ROC: 0.782	/	/	Yes (from an independent hospital)
Nomograms Predicting Progression-Free Survival, Overall Survival, and Pelvic Recurrence in Locally Advanced Cervical Cancer Developed From an Analysis of Identifiable Prognostic Factors in Patients From NRG Oncology/Gynecologic Oncology Group Randomized Trials of Chemoradiotherapy	Rose, P. G.	2015	develop	the United States	Locally Advanced, IB2-IVA	2-year PFS	2042	1302	Multiple imputation	c-index: 0.62	Yes	Bootstrap	Yes	cox regression	nomogram	histology, race/ethnicity, performance status, tumor size, FIGO stage, tumor grade, pelvic node status, treatment with concurrent cisplatin-based chemotherapy
			develop	the United States	Locally Advanced, IB2-IVA	5-year OS	2042	1215	Multiple imputation	c-index: 0.64	Yes	Bootstrap	Yes	cox regression	nomogram	Negative PA nodes found, histology, race/ethnicity, performance status, tumor size, International FIGO stage, tumor grade, pelvic node status, treatment with concurrent cisplatin-based chemotherapy
			develop	the United States	Locally Advanced, IB2-IVA	Pelvic Recurrence	2042	331	Multiple imputation	c-index: 0.73	Yes	Bootstrap	Yes	logistic regression	nomogram	age, histology, performance status, tumor size, FIGO stage, pelvic node status, treatment with concurrent cisplatin-based chemotherapy
			validate	Spain	LACC (FIGO IB1–IVA)	2-year PFS	264	87	No information	AUROC: 0.70	Yes	/	Yes (validated by other investigators)
			validate	Spain	LACC (FIGO IB1–IVA)	5-year OS	216	80	No information	AUROC: 0.66	Yes	/	Yes (validated by other investigators)
Complementary Prognostic Value of Pelvic Magnetic Resonance Imaging and Whole-Body Fluorodeoxyglucose Positron Emission Tomography/Computed Tomography in the Pretreatment Assessment of Patients With Cervical Cancer	Sala, E.	2015	develop	the United States	all cervical cancer patients	PFS	114	40	No information	c-index: 0.81	/	/	/	cox regression	/	Age at Diagnosis, Grade, Parametrial invasion on MRI, Para-aortic LN/distant metastasis on PET
Establishing a Nomogram for Stage IA-IIB Cervical Cancer Patients after Complete Resection	Zhou, H.	2015	develop	China	IA-IIB	5-year OS	1563	95	Complete case analysis	c-index: 0.71	Yes	Bootstrap	/	cox regression	equation+nomogram	Lymph node, pathology, tumor size, stromal invasion, parametrial infiltration, LVSI
Upregulation of long noncoding RNA SPRY4-IT1 correlates with tumor progression and poor prognosis in cervical cancer	Cao, Y.	2016	develop	China	IB-IIB, underwent radical resections	3/5-year OS	100	No information	No information	c‐index: 0.763	Yes	/	/	cox regression	nomogram	SPRY4‐IT1 in tumor, Tumor size, FIGO stage, SCC‐Ag, Lymph node metastasis
Prognostic risk model development and prospective validation among patients with cervical cancer stage IB2 to IIB submitted to neoadjuvant chemotherapy	Huang, K.	2016	develop	China	IB2 to IIB	5-year DFS	853	152	No information	AUC: 0.754	/	/	Yes	cox regression	equation+score	age, FIGO stage, grade, cell type, parametrial infiltration, lymph node metastasis
			validate	China		5-year DFS	447	91	No information	AUC: 0.766	/	/	Yes	cox regression
Development and validation of a surgical-pathologic staging and scoring system for cervical cancer	Li, S.	2016	develop	China	IA-III, treated surgically	5-year OS	4220	770	No information	/	/	/	Yes	cox regression	equation+score	LNM, parametrial invasion, histoligical types, grade, tumor size, stromal invasion, lymph-vascular invasion
			develop	China	IA-III, treated surgically	5-year DFS	4220	908	No information	/	/	/	Yes	cox regression	equation+score	LNM, parametrial invasion, histoligical types, grade, tumor size, stromal invasion, lymph-vascular invasion
			validate	China		5-year OS	1104	117	No information	/	/	/	Yes
			validate	China		5-year DFS	1104	143	No information	/	/	/	Yes
A postoperative scoring system for distant recurrence in node-positive cervical cancer patients after radical hysterectomy and pelvic lymph node dissection with para-aortic lymph node sampling or dissection	Lee, Y. J.	2017	develop	Korea	IA2 to IIB, early-stage	3-year distant RFS	223	54	No information	c-index: 0.777	Yes	Bootstrap	/	cox regression	sum score	Histology，Surgical stage，No. of total metastatic LNs
Prediction of 5-year overall survival in cervical cancer patients treated with radical hysterectomy using computational intelligence methods	Obrzut, B.	2017	develop	Poland	IA2-IIB	5-year OS	102	23	No information	c-index: 0.778	/	Cross-validation	/	cox regression	/	In total, 23 variables were identified, including 4 demographic characteristics: age, BMI, hormonal status, presence of concomitant diseases; 13 tumor-related parameters: FIGO stage, histologic type, grade, tumor size ≤4 cm or >4 cm, lymph nodes status, number of lymph nodes dissected, number of positive lymph nodes, lymph node ratio (ratio of positive to totally removed lymph nodes), lymph-vascu…
Validation of Nomograms for Survival and Metastases after Hysterectomy and Adjuvant Therapy in Uterine Cervical Cancer with Risk Factors	Yoon, W.S.	2017	develop	Korea	I-IIA	5-year OS	109	15	No information	c-index: 0.671	/	/	/	cox regression	/	age, tumor size
			develop	Korea	I-IIA	5-year DMFS	109	14	No information	c-index: 0.609	/	/	/	cox regression	/	tumor size, Lymph node involvement
			develop	Korea	I-IIA	5-year DFS	101	17	No information	c-index: 0.565	/	/	/	cox regression	/	age, Lymph node involvement
Nomogram predicting overall survival in operable cervical cancer patients	Zheng, R. E.	2017	develop	China	IA1-IIA，underwent operations for early stage	3/5-year OS	795	98	No information	c-index: 0.74	Yes	Bootstrap	/	cox regression	nomogram	BMI, albumin, platelet, leukocyte, tumor differentiation, PLN
Risk prediction model for disease-free survival in women with early-stage cervical cancers following postoperative (Chemo)radiotherapy	Je, H. U.	2018	develop	Korea	I or IIA, early-stage	5-year DFS	1069	179	No information	c-index: 0.723	Yes	Bootstrap	/	cox regression	nomogram	histologic type, tumor size, Pelvic lymph node status, parametrial involvement, lymphovascular invasion (LVI), depth of stromal invasion (DOI)
Survival nomograms after curative neoadjuvant chemotherapy and radical surgery for stage IB2-IIIB cervical cancer	Marchetti, C.	2018	develop	Italy	IB2-IIIB	5-year OS	245	67	Complete case analysis	c-index: 0.66	/	Bootstrap	/	cox regression	nomogram	BMI_25，Age_50 ，Tsize_4， Squamous， Grading ，FIGO， LVSI， Positive_lymph_nodes ，Positive_parametria
			develop	Italy	IB2-IIIB	2-year PFS	245	40	Complete case analysis	c-index: 0.64	/	Bootstrap	/	cox regression	nomogram	BMI_25，Age_50 ，Tsize_4， Squamous， Grading ，FIGO， LVSI， Positive_lymph_nodes ，Positive_parametria
A Prognostic Nomogram for Cervical Cancer after Surgery from SEER Database	Wang, C.	2018	develop	the United States	all cervical cancer patients	3/5-year OS	3603	No information	Complete case analysis	c-index: 0.749	Yes	/	Yes	cox regression	nomogram	size, grade, race, histology, FIGO, age, LODDS
			validate	China	all cervical cancer patients	3/5-year OS	4599	No information	Complete case analysis	c-index: 0.786	Yes	/	Yes	/
Multiparametric PET/MR (PET and MR-IVIM) for the evaluation of early treatment response and prediction of tumor recurrence in patients with locally advanced cervical cancer	Gao, S.	2019	develop	China	IIb to Iva, locally advanced	1/2/3-year RFS	51	25	Complete case analysis	c-index: 0.764	/	Bootstrap	/	cox regression	equation+nomogram	Pre-TLG, Δ%D, suspicious lymph node metastasis(SLNM)
Postoperative nomogram for the prediction of disease-free survival in lymph node-negative stage I–IIA cervical cancer patients treated with radical hysterectomy	Gülseren, V.	2019	develop	Turkey	IA2–IIA	3/5-year DFS	194	18	No information	c-index: 0.895	Yes	Not reported validation method	/	cox regression	equation+nomogram	stage,Tumour size， parametrial margin，cuff margin，endomyometrial infiltration， LVSI
Enhancing prognosis prediction using pre-treatment nodal SUVmax and HPV status in cervical squamous cell carcinoma	Hong, C. M.	2019	develop	Korea	IA3–IIA, CCRT	DFS	129	29	No information	/	/	/	/	cox regression	CART	nodal SUVmax, HPV infection
Prognostic Value of Preoperative Systemic Immune-Inflammation Index in Patients with Cervical Cancer	Huang, H.	2019	develop	China	IA–IIA, receiving radical resection	3/5-year OS	328	No information	No information	/	/	/	/	cox regression	nomogram	Lymph node metastasis,FIGO stage , SII
Survival outcome prediction in cervical cancer: Cox models vs deep-learning model	Matsuo, K.	2019	develop	the United States	I-IV invasive cervical cancer	PFS	768	241	No information	c-index: 0.795	/	Cross-validation	/	Deep Learning	/	baseline characteristics: age, race/ethnicity, body mass index, vital signs, comorbidities, and pretreatment laboratory results; tumor characteristics: histologic type and cancer stage; treatment type: Beta-blocker use, Primary hysterectomy, Radiotherapy, Chemotherapy
			develop	the United States	I-IV invasive cervical cancer	OS	768	170	No information	c-index: 0.616	/	Cross-validation	/	Deep Learning	/	baseline characteristics: age, race/ethnicity, body mass index, vital signs, comorbidities, and pretreatment laboratory results; tumor characteristics: histologic type and cancer stage; treatment type: Beta-blocker use, Primary hysterectomy, Radiotherapy, Chemotherapy
Prediction of 10-year Overall Survival in Patients with Operable Cervical Cancer using a Probabilistic Neural Network	Obrzut, B.	2019	develop	Poland	IA2–IIB, Operable	10-year OS	102	28	Complete case analysis	AUROC: 0.809	/	Cross-validation	/	Probabilistic Neural Network(PNN)	/	demographic characteristics: age, body mass index (BMI), hormonal status, the presence of concomitant diseases; tumor-related parameters: FIGO stage, histologic type, histologic grade, tumor size ( 4 cm or > 4 cm), lymph node status, number of lymph nodes dissected, number of positive lymph nodes, lymph node ratio (ratio of positive to totally removed lymph nodes), lymph-vascular space invasion (…
Prognostic Model for Survival and Recurrence in Patients with Early-Stage Cervical Cancer: A Korean Gynecologic Oncology Group Study (KGOG 1028)	Paik, E. S.	2019	develop	Korea	IB-IIA, Early-Stage	2/5-year DFS	788	No information	Complete case analysis	ROC: 0.842/0.836	/	/	Yes	cox regression	equation	adenocarcinoma, LVSI, deep third DI, p-LNM, pa-LNM, Hb
			develop	Korea	IB-IIA, Early-Stage	2/5-year OS	788	No information	Complete case analysis	ROC: 0.939/0.882	/	/	Yes	cox regression	equation	stage, adenocarcinoma, LVSI, deep third DI, pa-LNM, Hb
			develop	Korea	IB-IIA, Early-Stage	lymphatic recurrence at 2/5-year	788	No information	Complete case analysis	ROC: 0.959/0.930	/	/	Yes	cox regression	equation	deep third DI, p-LNM, pa-LNM, age
			develop	Korea	IB-IIA, Early-Stage	hematogenous recurrence at 2/5-year	788	No information	Complete case analysis	ROC: 0.909/0.867	/	/	Yes	cox regression	equation	adenocarcinoma, LVSI, deep third DI, pa-LNM, PMI
			validate	Korea	IB-IIA	2/5-year DFS	653	No information	Complete case analysis	ROC: 0.799/0.723	/	/	Yes（from other institutions）
			validate	Korea	IB-IIA	2/5-year OS	653	No information	Complete case analysis	ROC: 0.844/0.806	/	/	Yes（from other institutions）
			validate	Korea	IB-IIA	lymphatic recurrence at 2/5-year	653	No information	Complete case analysis	ROC: 0.639/0.612	/	/	Yes（from other institutions）
			validate	Korea	IB-IIA	hematogenous recurrence at 2/5-year	653	No information	Complete case analysis	ROC: 0.823/0.794	/	/	Yes（from other institutions）
Nomograms predicting survival and patterns of failure in patients with cervical cancer treated with concurrent chemoradiotherapy: A special focus on lymph nodes metastases	Wang, W.	2019	develop	China	IB1-IVA, definitive radiotherapy or CCRT	3/5-year OS	833	No information	No information	c-index: 0.73	Yes	Bootstrap	/	cox regression	nomogram	histology, FIGO stage, para-aortic LNM,pelvic LNM, pelvic MLNs number
			develop	China	IB1-IVA	3/5-year DFS	833	195	No information	c-index: 0.71	Yes	Bootstrap	/	cox regression	nomogram	histology, FIGO stage, para-aortic LNM, pelvic LNM, pelvic MLNs number
			develop	China	IB1-IVA	3/5-year LC	833	No information	No information	c-index: 0.73	Yes	Bootstrap	/	cox regression	nomogram	histology, FIGO stage, para-aortic LNM, pelvic LNM, diameter of pelvic MLNs
			develop	China	IB1-IVA	3/5-year DMF	833	121	No information	c-index: 0.67	Yes	Bootstrap	/	cox regression	nomogram	histology, FIGO stage, pelvic LNM, pelvic MLNs number
Nomograms for predicting the survival rate for cervical cancer patients who undergo radiation therapy: a SEER analysis	Yang, J.	2019	develop	the United States	all cervical cancer patients	3/5-year OS	2869	No information	Complete case analysis	c-index: 0.672	Yes	Random split	/	cox regression	nomogram	age at diagnosis, race, histology, Grade, FIGO stage, tumor size and LND
			develop	the United States	all cervical cancer patients	3/5-year DSS	2869	No information	Complete case analysis	c-index: 0.684	Yes	Random split	/	cox regression	nomogram	race, histology, Grade, FIGO stage, tumor size and LND
Nomograms based on HPV load for predicting survival in cervical squamous cell carcinoma: An observational study with a long-term follow-up	Zuo, J.	2019	develop	China	IB1-IIA	10-year PFS for RH group	360	41	No information	c-index: 0.756	Yes	Bootstrap	/	cox regression	nomogram	HPV viral load, FIGO stage, lymph node
			develop	China	IIB-IVA	10-year PFS for CCRT group	160	45	No information	c-index: 0.749	Yes	Bootstrap	/	cox regression	nomogram	HPV viral load, SCC Ag, lymph node status determined by CT
Score for the Overall Survival Probability of Patients With First-Diagnosed Distantly Metastatic Cervical Cancer: A Novel Nomogram-Based Risk Assessment System	Zhang, S.	2019	develop	the United States	Metastatic cervical cancer	1/3-year OS	880	No information	Complete case analysis	c-index: 0.751	Yes	Random split	/	cox regression	nomogram	age, race, pathological type, metastasis number, radiotherapy, chemotherapy
An Innovative Immune Score-Based Prognostic Nomogram for Patients with Cervical Cancer	Qi, X.	2020	develop	the United States	I-IV	3/5-year OS	198	41	Complete case analysis	c-index: 0.720	Yes	Bootstrap	/	cox regression	nomogram	age, FIGO stage, immune_score
Calculating the overall survival probability in patients with cervical cancer: a nomogram and decision curve analysisbased study	Xie, G.	2020	develop	the United States	I-IV	3/5-year OS	9876	2505	Complete case analysis	c-index: 0.826	Yes	Bootstrap	/	cox regression	nomogram	age, race, marital status, grade, histology, tumor size, FIGO stage, primary site surgery, regional lymph node surgery, radiotherapy, chemotherapy
Prognostic Nomograms Predicting Survival in Patients With Locally Advanced Cervical Squamous Cell Carcinoma: The First Nomogram Compared With Revised FIGO 2018 Staging System	Yang, X.	2020	develop	China	IB–IVA, LACC	5-year OS	613	109	Complete case analysis	c-index: 0.713	Yes	Bootstrap	/	cox regression	nomogram	SCC-Ag, BMI, tumor size, pelvic wall involvement, PALNM-paraaortic lymph node metastasis
			develop	China	IB–IVA, LACC	5-year PFS	613	164	Complete case analysis	c-index: 0.686	Yes	Bootstrap	/	cox regression	nomogram	BMI, HGB-pretreatment hemoglobin, tumor size, pelvic wall involvement, PLNM, and PALNM
Characteristics and Treatments of Patients Aged 65 Years or Over with Cervical Cancer	Xie, S.	2020	develop	the United States	≥65y, I-IV	1/3/5 CSS	6654	2703	Complete case analysis	c-index: 0.7945	Yes	/	/	cox regression	nomogram	race, marriage, histology, grade, FIGO, regional_lymph, surgery, radiotherapy, chemotherapy
Prognostic Factors and Local Treatment Modalities of Small-Cell Carcinoma of the Cervix: An Analysis According to the International Federation of Gynecology and Obstetrics Stage	Huang, R.	2020	develop	the United States	Small-cell carcinoma of the cervix(SCCC), I-IIA	3/5-year OS	330	178	No information	c-index: 0.67	Yes	Bootstrap	/	cox regression	nomogram	age, cancer-directed surgery, LN involvement, chemotherapy, radiation
			develop	the United States	Small-cell carcinoma of the cervix(SCCC), IIB-IV	3/5-year OS	314	264	No information	c-index: 0.67	Yes	Bootstrap	/	cox regression	nomogram	age, cancer-directed surgery, tumor size, chemotherapy, radiation
A prognostic nomogram integrating novel biomarkers identified by machine learning for cervical squamous cell carcinoma	Li, Y.	2020	develop	China	I-IV	1/3/5-year PFS	36	16	Complete case analysis	c-index: 0.828	Yes	/	Yes	cox regression	nomogram	FIGO stage, therapy outcome, a risk score based on mRNA expression status
			validate	the United States	I-IV	1/3/5-year PFS	252	68	No information	c-index: 0.864	Yes	/	Yes
Prognosis-Predicting Model Based on [(18)F]fluorodeoxyglucose PET Metabolic Parameters in Locally Advanced Cervical Cancer Patients Treated with Concurrent Chemoradiotherapy: Multi-Center Retrospective Study	Lee, W. K.	2020	develop	Korea	≥IIB, treated with CCRT	2-year DFS	270	69	No information	c-index: 0.75	Yes	Bootstrap	/	cox regression	nomogram	age, FIGO stage, tumor size, serum SCC antigen levels, pSUVmax, nSUVmax
			develop	Korea	≥IIB, treated with CCRT	5-year OS	270	33	No information	c-index: 0.78	Yes	Bootstrap	/	cox regression	nomogram	age, FIGO stage, tumor size, serum SCC antigen levels, pSUVmax, nSUVmax, HPV status
Moving beyond the Cox proportional hazards model in survival data analysis: a cervical cancer study	Li, L.	2020	develop	the United States	I-III	5-year DDR (dynamic death rate)	713	162	Complete case analysis	c-index: 0.868	Yes	Bootstrap	/	proportional baselines landmark supermodel (PBLS model, producing dynamic prediction)	equation	age, FIGO stage, Lymph node metastasis, Radiation
A prognostic model guides surgical resection in cervical squamous cell carcinoma	Liang, B.	2020	develop	the United States	I-IV	1/3/5-year OS	5620	1177	Complete case analysis	c-index: 0.771	Yes	Bootstrap; random split	/	cox regression	nomogram	age, RX Summ-Surg Prim Site, tumor size
Development and validation of a SEER-based prognostic nomogram for cervical cancer patients below the age of 45 years	Liu, Q.	2020	develop	the United States	I-IV	3/5/10-year OS	7055	No information	Complete case analysis	c-index: 0.831	Yes	Random split	/	cox regression	nomogram	race, histological type, grade, AJCC stage, T stage, SEER stage, tumor size (cm), chemotherapy, radiotherapy
			develop	the United States	I-IV	3/5/10-year CSS	7055	No information	Complete case analysis	c-index: 0.855	Yes	Random split	/	cox regression	nomogram	race, histological type, grade, AJCC stage, T stage, SEER stage, tumor size (cm), chemotherapy, radiotherapy
18F-FDG PET/CT Habitat Radiomics Predicts Outcome of Patients with Cervical Cancer Treated with Chemoradiotherapy	Mu, W.	2020	develop	the United States	IIB-IVA	0.5/1/2-year PFS	78	No information	Complete case analysis	c-index: 0.85	Yes	/	Yes（from other institution）	cox regression	nomogram	rHab-PFS, T stage, LN status
			develop	the United States	IIB-IVA	1/2.5/4-year OS	78	No information	Complete case analysis	c-index: 0.86	Yes	/	Yes（from other institution）	cox regression	nomogram	rHab-OS, T stage, LN status
			validate	China	IIB-IVA	0.5/1/2-year PFS	76	No information	Complete case analysis	c-index: 0.82	Yes	/	Yes（from other institution）
			validate	China	IIB-IVA	1/2.5/4-year OS	76	No information	Complete case analysis	c-index: 0.82	Yes	/	Yes（from other institution）
A Novel Prognostic Marker Systemic Inflammation Response Index (SIRI) for Operable Cervical Cancer Patients	Chao, B.	2020	develop	China	IA–IIA	3/5-year OS	441	No information	Complete case analysis	c-index: 0.80	Yes	Bootstrap	Yes（from other institution）	cox regression	nomogram	SIRI, FIGO stage and lymphovascular invasion
			validate	China	IA–IIA	3/5-year OS	164	No information	Complete case analysis	AUROC: 0.73/0.74	Yes	/	Yes（from other institution）
Dynamic prediction and prognostic analysis of patients with cervical cancer: a landmarking analysis approach	Yang, Z.	2020	develop	the United States	I-IV	5/10-year OS	1501	363	Complete case analysis	c-index: 0.80-0.90	Yes	Cross-validation	/	cox regression, with interactions between covariates and prediction time; dynamic prediction model	/	age of diagnosis, FIGO stage, lymph node metastasis, histological type, marital status, treatment method
